# Supplementary material
Source: PubMed Central journal article supplement (PMC7780705)
Supplement: i1537-2073-22-6-285_s01.pdf [file i1537-2073-22-6-285_s01.pdf]

**Table S1. Overview of publications**

| <b>First author, publication year<sup>ref. no.</sup></b> | <b>Topic</b>                                                                    | <b>Country</b> | <b>Design</b>                        | <b>Population</b>        | <b>N</b>                    | <b>Aims</b>                                                                                                                                                             |
|----------------------------------------------------------|---------------------------------------------------------------------------------|----------------|--------------------------------------|--------------------------|-----------------------------|-------------------------------------------------------------------------------------------------------------------------------------------------------------------------|
| <b>Driedger et al, 2017<sup>38</sup></b>                 | CCSVI                                                                           | Canada         | Qualitative                          | PwMS and MS stakeholders | 69 PwMS, 15 stakeholders    | To explore the discussions between PwMS and their neurologists following the release of news of Zamboni's hypothesis.                                                   |
| <b>Murray et al, 2014<sup>39</sup></b>                   | CCSVI                                                                           | Canada         | Qualitative                          | PwMS                     | 15                          | To explore the experience of liberation procedure decision-making in PwMS.                                                                                              |
| <b>Ploughman et al, 2014<sup>40</sup></b>                | CCSVI                                                                           | Canada         | Qualitative                          | PwMS                     | 15                          | To explore the liberation-procedure decision-making in PwMS.                                                                                                            |
| <b>Snyder et al, 2014<sup>41</sup></b>                   | CCSVI                                                                           | Canada         | Qualitative                          | PwMS                     | 15                          | To assess the experiences of Canadians with MS seeking CCSVI treatment abroad.                                                                                          |
| <b>Hynes et al, 2019<sup>43</sup></b>                    | CCSVI                                                                           | UK             | Mixed methods                        | PwMS                     | 1293 videos by 54 PwMS      | To determine if PwMS continue to report the benefits of CCSVI treatment on YouTube, and if perspectives have changed.                                                   |
| <b>Ghahari et al, 2016<sup>42</sup></b>                  | CCSVI                                                                           | Canada         | Observational, cross-sectional study | PwMS; HCPs               | 621 videos by 224 PwMS      | To review videos related to MS and CCSVI posted by PwMS on YouTube that describe symptoms before and after the surgical procedure, as well as videos presented by HCPs. |
| <b>Bansback et al, 2019<sup>29</sup></b>                 | DMD decision-making; decision aid                                               | Canada         | Mixed methods                        | PwMS                     | 25 (survey, N=18; FGM, N=7) | To develop and test the efficacy of a patient decision aid for first-line DMDs for PwRRMS.                                                                              |
| <b>Bottomley et al, 2017<sup>18</sup></b>                | DMD decision-making; attributes; discrete-choice experiment; conjoint analysis; | UK             | Observational, cross-sectional study | PwMS                     | 350                         | To explore PwMS preference for different DMD attributes.                                                                                                                |

| First author, publication year <sup>ref. no.</sup>   | Topic                                                                         | Country             | Design                               | Population | N                                                                                                                         | Aims                                                                                                                                                                                                                 |
|------------------------------------------------------|-------------------------------------------------------------------------------|---------------------|--------------------------------------|------------|---------------------------------------------------------------------------------------------------------------------------|----------------------------------------------------------------------------------------------------------------------------------------------------------------------------------------------------------------------|
|                                                      | patient preference                                                            |                     |                                      |            |                                                                                                                           |                                                                                                                                                                                                                      |
| <b>Brown et al, 2018<sup>33</sup></b>                | DMD decision-making                                                           | EU countries and US | Observational, cross-sectional study | PwMS       | 1586 (Q4 2015), 1591 (Q4 2016), 1698 (Q4 2017) and 688 (Q4 2015), 602 (Q4 2016), 663 (Q4 2017) charts of eligible PwRRMS. | To assess PwMS engagement level in treatment decision-making in Europe (UK/Germany/France/Italy/Spain), and in the US.                                                                                               |
| <b>Bruce et al, 2016<sup>19</sup></b>                | DMD decision-making; adherence; behavioral economics; probability discounting | US                  | Observational, cross-sectional study | PwMS       | 77 (38 non-adherent and 39 adherent PwMS)                                                                                 | To examine if the behavioral economic construct of probability discounting (i.e. weighing of relative risks and benefits when deciding to take DMDs) can be used to explain treatment decisions in chronic diseases. |
| <b>Bruce et al, 2018<sup>20</sup></b>                | DMD decision-making; probability discounting                                  | US                  | Observational, cross-sectional study | PwMS       | 208                                                                                                                       | To test a probability discounting model to explain the independent influences of risks and benefits when patients make hypothetical treatment decisions.                                                             |
| <b>Ceuninck van Capelle et al, 2017<sup>37</sup></b> | DMD decision-making; use of DMDs                                              | Netherlands         | Qualitative                          | PwMS       | 10                                                                                                                        | To explore the perspective of PwMS on using DMDs.                                                                                                                                                                    |

| First author, publication year <sup>ref. no.</sup> | Topic                                                  | Country                                                                              | Design                               | Population | N                         | Aims                                                                                                                                                                    |
|----------------------------------------------------|--------------------------------------------------------|--------------------------------------------------------------------------------------|--------------------------------------|------------|---------------------------|-------------------------------------------------------------------------------------------------------------------------------------------------------------------------|
| <b>Cofield et al, 2017<sup>30</sup></b>            | DMD decision-making; patient preference (CPS)          | US, Canada and over 50 other countries (Countries for this survey were not reported) | Observational, cross-sectional study | PwMS       | 7009                      | To assess the role preferences of a large cohort of PwMS (NARCOMS Registry).                                                                                            |
| <b>Col et al, 2018<sup>14</sup></b>                | DMD decision-making; patient preference                | US                                                                                   | Observational, cross-sectional study | PwMS       | 135                       | To evaluate the accuracy, completeness, and representativeness of a preference assessment tool in a national sample of PwMS.                                            |
| <b>D'Amico et al, 2016<sup>31</sup></b>            | DMD decision-making; patient preference                | Italy                                                                                | Observational, cross-sectional study | PwMS       | 100                       | To examine factors associated with PwMS role preferences in the therapeutic decision-making process.                                                                    |
| <b>Eskyte et al, 2019<sup>10</sup></b>             | DMD decision-making; critical interpretative synthesis | UK                                                                                   | Qualitative                          | PwMS       | 83 studies                | To explore the experience of PwRRMS and their perspectives in choosing DMDs.                                                                                            |
| <b>Fox et al, 2015<sup>21</sup></b>                | DMD decision-making; risk tolerance; standard gamble   | US                                                                                   | Observational, cross-sectional study | PwMS       | 5446                      | To determine PwMS tolerance to risky therapies and identify associated characteristics.                                                                                 |
| <b>Heesen et al, 2017a<sup>32</sup></b>            | DMD decision-making; natalizumab; patient              | Germany (n=73 centres)                                                               | Observational, cross-sectional study | PwMS       | 801 PwMS, 99 neurologists | To assess the role preferences, perception of severity of MS, PML risk, and efficacy of natalizumab, knowledge about results of pivotal natalizumab trials and PML risk |

| First author, publication year <sup>ref. no.</sup> | Topic                                                                       | Country     | Design                               | Population           | N                                  | Aims                                                                                                                                                                                                    |
|----------------------------------------------------|-----------------------------------------------------------------------------|-------------|--------------------------------------|----------------------|------------------------------------|---------------------------------------------------------------------------------------------------------------------------------------------------------------------------------------------------------|
|                                                    | preference; risk perception; risk knowledge                                 |             |                                      |                      |                                    | stratification, and PML risk tolerance of a large cohort of natalizumab -treated PwMS and their neurologists.                                                                                           |
| Hincapie et al, 2017 <sup>12</sup>                 | DMD decision-making; attributes; conjoint analysis; patient preference      | US          | Observational, cross-sectional study | PwMS                 | 129                                | To assess the preferences of PwMS for non-economic and economic attributes of current DMDs.                                                                                                             |
| Jarmolowicz et al, 2017 <sup>22</sup>              | DMD decision-making; adherence; behavioral economics; side effect           | US          | Observational, cross-sectional study | PwMS                 | 49                                 | To investigate how side effect severity influences hypothetical medication decision-making of PwMS; to determine if these decision-making patterns relate to clinical measures of medication adherence. |
| Köpke et al, 2014 <sup>25</sup>                    | DMD decision-making; information provision in MS; patient education program | Germany     | RCT                                  | PwMS                 | 192 (IG, 93; CG, 99)               | To evaluate the efficacy of an evidence-based patient information program aiming to increase informed choice in PwMS.                                                                                   |
| Köpke et al, 2016 <sup>26</sup>                    | DMD decision-making; Patient education;                                     | Germany     | Quasi-experimental                   | PwMS                 | 156 (IG, 75; CG, 81)               | To investigate the effectiveness of a multi-component evidence-based education program on DMDs in PwMS.                                                                                                 |
| Kremer et al, 2018 <sup>15</sup>                   | DMD decision-making; attributes; neurologists and                           | Netherlands | Observational, cross-sectional study | Neurologists; nurses | 60 (27 neurologists, 33 MS nurses) | To assess which DMD attributes are most important for the HCPs in selecting a DMD; to compare their perspectives on DMDs.                                                                               |

| First author, publication year <sup>ref. no.</sup> | Topic                                                          | Country     | Design                               | Population | N                        | Aims                                                                                                                                                                  |
|----------------------------------------------------|----------------------------------------------------------------|-------------|--------------------------------------|------------|--------------------------|-----------------------------------------------------------------------------------------------------------------------------------------------------------------------|
|                                                    | MS nurses                                                      |             |                                      |            |                          |                                                                                                                                                                       |
| <b>Kremer et al, 2016</b> <sup>11</sup>            | DMD decision-making; attributes; Nominal group Technique       | Netherlands | Mixed methods                        | PwMS       | FGM: N=19; survey: N=185 | To identify the full spectrum of DMD attributes; to quantify their relative importance in PwMS                                                                        |
| <b>Lowden et al, 2014</b> <sup>36</sup>            | DMD decision-making                                            | Canada      | Qualitative                          | PwRRMS     | 9                        | To explore the lived experience of making a first decision about treatment with DMDs in PwRRMS.                                                                       |
| <b>Lee Mortensen et al, 2017</b> <sup>35</sup>     | DMD decision-making; treatment preference                      | Denmark     | Qualitative                          | PwMS       | Five FGMs with 40 PwMS   | To explore the main factors affecting PwMS preferences regarding DMD treatment and health care.                                                                       |
| <b>Rahn et al, 2015</b> <sup>28</sup>              | DMD decision-making; decision coaching, shared decision-making | Germany     | RCT protocol                         | PwMS       | -                        | To test the feasibility of a decision coaching program.                                                                                                               |
| <b>Rahn et al, 2018</b> <sup>27</sup>              | DMD decision-making; decision coaching, shared decision-making | Germany     | RCT                                  | PwMS       | 38/35                    | To test the feasibility of a decision coaching program.                                                                                                               |
| <b>Rath et al, 2017</b> <sup>57</sup>              | DMD decision-making; understanding of PML risk                 | Australia   | Observational, cross-sectional study | PwMS       | 37                       | To assess PwMS understanding of their individual risk of PML, knowledge of the potential symptoms of PML, and their engagement in detecting possible symptoms of PML. |

| First author, publication year <sup>ref. no.</sup> | Topic                                                                                              | Country                       | Design                               | Population         | N                          | Aims                                                                                                                                                                                                       |
|----------------------------------------------------|----------------------------------------------------------------------------------------------------|-------------------------------|--------------------------------------|--------------------|----------------------------|------------------------------------------------------------------------------------------------------------------------------------------------------------------------------------------------------------|
| <b>Tintore et al, 2017<sup>16</sup></b>            | DMD decision-making; satisfaction; treatment expectations                                          | Italy, Germany, Spain, UK, US | Observational, cross-sectional study | PwMS; neurologists | 900 neurologists, 982 PwMS | To assess the current state of MS care from both PwMS and neurologists; to gain insight into perceptions of treatment expectations, treatment decisions, treatment challenges, and satisfaction with care. |
| <b>Sempere et al, 2017<sup>13</sup></b>            | DMD decision-making; attributes; patient preference                                                | Spain                         | Observational, cross-sectional study | PwMS               | 37                         | To evaluate PwMS preferences toward key DMDs attributes.                                                                                                                                                   |
| <b>Utz et al, 2014<sup>17</sup></b>                | DMD decision-making; attributes; conjoint analysis; patient preference                             | Germany                       | Observational, cross-sectional study | PwMS               | 156                        | To assess patients' implicit preferences for oral vs. parenteral DMDs, and influences on preferences.                                                                                                      |
| <b>Wicks et al, 2015<sup>23</sup></b>              | DMD decision-making; attributes; discrete-choice experiment; conjoint analysis; patient preference | US                            | Observational, cross-sectional study | PwMS               | 319                        | To explore the preferences of oral-naïve PwMS regards to oral DMD attributes.                                                                                                                              |
| <b>Wilkie et al, 2019<sup>34</sup></b>             | DMD decision-making, decisional conflict                                                           | UK                            | Observational, cross-sectional study | PwMS               | 254                        | To determine if decisional conflict and decisional regret reflect different stages of the decision-making process when initiating DMDs.                                                                    |

| First author, publication year <sup>ref. no.</sup> | Topic                                                                  | Country | Design                               | Population    | N                                                                                         | Aims                                                                                                                                           |
|----------------------------------------------------|------------------------------------------------------------------------|---------|--------------------------------------|---------------|-------------------------------------------------------------------------------------------|------------------------------------------------------------------------------------------------------------------------------------------------|
| Wilson et al, 2014 <sup>24</sup>                   | DMD decision-making; attributes; conjoint analysis; patient preference | US      | Observational, cross-sectional study | PwMS          | 291                                                                                       | To calculate patient preferences for risk/benefit trade-offs for hypothetical DMDs.                                                            |
| Dehghani et al, 2018 <sup>64</sup>                 | Health literacy; questionnaire                                         | Iran    | Mixed methods                        | PwMS; experts | Face validity: N=12 PwMS; content validity: N=15 experts; construct validity: N= 210 PwMS | To develop and validate a questionnaire for the assessment of health literacy in PwMS.                                                         |
| Gaissmaier et al, 2018 <sup>62</sup>               | Health literacy; numeracy                                              | Germany | Observational, cross-sectional study | PwMS          | 725                                                                                       | To investigate whether MS patients' numeracy was impaired compared to a probabilistic national sample.                                         |
| Kasper et al, 2017 <sup>60</sup>                   | Health literacy; understanding of absolute risk reduction              | Germany | RCT                                  | PwMS          | 682                                                                                       | To evaluate newly developed bar graphs for PwMS risk communication in comparison to standard pictographs.                                      |
| Rahn et al, 2016 <sup>63</sup>                     | Health literacy; comprehension of confidence intervals                 | Germany | Mixed methods                        | PwMS          | Qualitative study: N=16; RCT: N=64 (IG: 36; CG: 28)                                       | To develop and pilot-test different written patient information materials explaining confidence intervals to PwRRMS.                           |
| Reen et al, 2018 <sup>61</sup>                     | Health literacy; understanding of risks and benefits                   | UK      | Observational, cross-sectional study | PwMS          | 45                                                                                        | To identify the best methods of communicating clinical trial data; to examine the relationship between patients' understanding with decisional |

| First author, publication year <sup>ref. no.</sup> | Topic                                                                    | Country | Design                               | Population                     | N                                                                             | Aims                                                                                                                                                                                                       |
|----------------------------------------------------|--------------------------------------------------------------------------|---------|--------------------------------------|--------------------------------|-------------------------------------------------------------------------------|------------------------------------------------------------------------------------------------------------------------------------------------------------------------------------------------------------|
|                                                    |                                                                          |         |                                      |                                |                                                                               | conflict, individual traits, and MS symptoms.                                                                                                                                                              |
| <b>Borreani et al, 2014<sup>46</sup></b>           | Information provision/patient education; Information aid                 | Italy   | Qualitative                          | PwMS; physicians; neurologists | Interviews with 9 PwMS; FGM with 4 physicians; FGM with 6 caring neurologists | To scrutinize the experience of SIMS-Trial participants in order to gain better understanding of the effectiveness of the information aid and its components.                                              |
| <b>Brand et al, 2014<sup>48</sup></b>              | Information provision/patient education; MRI knowledge                   | Germany | Mixed methods                        | PwMS                           | Interviews: N=5; survey: N=104; pilot testing: N=26                           | To investigate patients' experiences, knowledge and interest concerning MRI using mixed-methods. To develop and pilot-test an evidence-based patient education program on MRI in MS.                       |
| <b>Colombo et al, 2014<sup>51</sup></b>            | Information provision/patient education; web (search behavior)           | Italy   | Qualitative                          | PwMS; family members           | FGMs: 40 PwMS, 20 family members                                              | To analyze PwMS and their family members' experience about the Web-based health information, to evaluate how they assess this information, and how they integrate health information with personal values. |
| <b>Colombo et al, 2016<sup>53</sup></b>            | Information provision/patient education; web (website development); DMDs | Italy   | Observational, cross-sectional study | PwMS                           | 276 PwMS, 68 family members, and 89 others                                    | To describe the development of the Italian IN-DEEP website and its assessment through an online survey.                                                                                                    |



| First author, publication year <sup>ref. no.</sup> | Topic                                                             | Country | Design                               | Population             | N                                                            | Aims                                                                                                                                                                |
|----------------------------------------------------|-------------------------------------------------------------------|---------|--------------------------------------|------------------------|--------------------------------------------------------------|---------------------------------------------------------------------------------------------------------------------------------------------------------------------|
| Della Rosa et al, 2019 <sup>54</sup>               | Information provision/patient education; Social network           | US      | Observational, cross-sectional study | PwMS                   | 24,915 members                                               | To investigate the potential role of social network sites in health care.                                                                                           |
| Dennison et al, 2018 <sup>49</sup>                 | Information provision/patient education; patient preference       | UK      | Observational, cross-sectional study | PwMS                   | 3175                                                         | To investigate the prognosis communication experiences and preferences of PwMS.                                                                                     |
| Giordano et al, 2014 <sup>44</sup>                 | Information provision/patient education; Information aid          | Italy   | Controlled trial                     | PwMS                   | 159 (whole information aid: N=77; take-home materials: N=82) | To assess the effectiveness of an information aid in clinical practice and to compare the whole information aid with the take-home booklet/website component alone. |
| Giunti et al, 2018 <sup>58</sup>                   | Information provision/patient education; Apps                     | Spain   | Review-scoping                       | PwMS                   |                                                              | To assess how the features present in MS apps meet the reported needs of PwMS.                                                                                      |
| Lavorgna et al, 2017 <sup>55</sup>                 | Information provision in MS; social media; quality of information | Italy   | Other                                | PwMS                   | -                                                            |                                                                                                                                                                     |
| Lavorgna et al, 2018 <sup>56</sup>                 | Information provision/patient education; social media             | Italy   | Observational, cross-sectional study | PwMS                   |                                                              | To assess the role of appointed influencers in a medically supervised Italian web community (SMsocialnetwok.com) for PwMS.                                          |
| Mazanderani et al, 2019 <sup>50</sup>              | Information provision/patient education;                          | UK      | Qualitative                          | PwMS, partners, family | 77                                                           | To explore the intra-familial dynamics of managing health information in the context of chronic illness.                                                            |

| First author, publication year <sup>ref. no.</sup> | Topic                                                    | Country                      | Design             | Population                | N                               | Aims                                                                                                                                                           |
|----------------------------------------------------|----------------------------------------------------------|------------------------------|--------------------|---------------------------|---------------------------------|----------------------------------------------------------------------------------------------------------------------------------------------------------------|
|                                                    | management within the family                             |                              |                    | members and close friends |                                 |                                                                                                                                                                |
| <b>Mohamadirizi et al, 2017<sup>45</sup></b>       | Information provision/patient education; (CD; booklet)   | Iran                         | Quasi-experimental | PwMS                      | 120 (IG: 60; CG: 60)            | To compare the effect of electronic education and illustrated booklet on knowledge of PwMS.                                                                    |
| <b>Riemann-Lorenz et al, 2016<sup>59</sup></b>     | Information provision/patient education; diet            | Germany                      | Mixed methods      | PwMS                      | Survey: N=337; pilot test: N=13 | To design and pilot-test an evidence based patient education program on the influence of diet on MS.                                                           |
| <b>Synnot et al, 2014<sup>52</sup></b>             | Information provision/patient education; Internet        | Australia                    | Qualitative        | PwMS; family members      | 51 PwMS, 9 family members       | To explore needs, experiences and preferences of PwMS for integrating treatment information into decision-making, in the context of searching on the Internet. |
| <b>Solari et al, 2010<sup>47</sup></b>             | Information provision/patient education; Information aid | Italy                        | RCT                | PwMS                      | 120 PwMS                        | To assess the effectiveness of an add-on information aid for newly diagnosed MS patients.                                                                      |
| <b>Heesen et al, 2015<sup>65</sup></b>             | Risk knowledge; questionnaire                            | Germany                      | Mixed methods      | Experts                   |                                 | To develop the RIKNO 1.0 questionnaire.                                                                                                                        |
| <b>Heesen et al, 2017b<sup>66</sup></b>            | Risk knowledge; questionnaire                            | Europe (FGM), survey Germany | Mixed methods      | PwMS                      | FGM: 35; survey: 708            | To produce a revised RIKNO 2.0 questionnaire using mixed methodology in a European setting.                                                                    |

| <b>First author, publication year<sup>ref. no.</sup></b> | <b>Topic</b>           | <b>Country</b>                                         | <b>Design</b>                        | <b>Population</b> | <b>N</b> | <b>Aims</b>                                                                                                                                      |
|----------------------------------------------------------|------------------------|--------------------------------------------------------|--------------------------------------|-------------------|----------|--------------------------------------------------------------------------------------------------------------------------------------------------|
| <b>Giordano et al, 2018<sup>3</sup></b>                  | Risk knowledge; survey | Germany, Italy, The Netherlands, Serbia, Spain, Turkey | Observational, cross-sectional study | PwMS              | 1939     | To investigate the level of risk knowledge and role preferences in eight countries and assess putative variables associated with risk knowledge. |

CCSVI, chronic cerebrospinal venous insufficiency; CG, control group; DMD, disease-modifying drug; FGM, Focus Group Meeting. HCPs, health care professionals; IG, intervention group; MRI, magnetic resonance imaging; PwMS, people with multiple sclerosis; PML, progressive multifocal leukoencephalopathy); RCT, randomized controlled trial; RRMS, relapsing-remitting multiple sclerosis; UK, United Kingdom; US, United States.

**Figure S1. Study flow diagram**

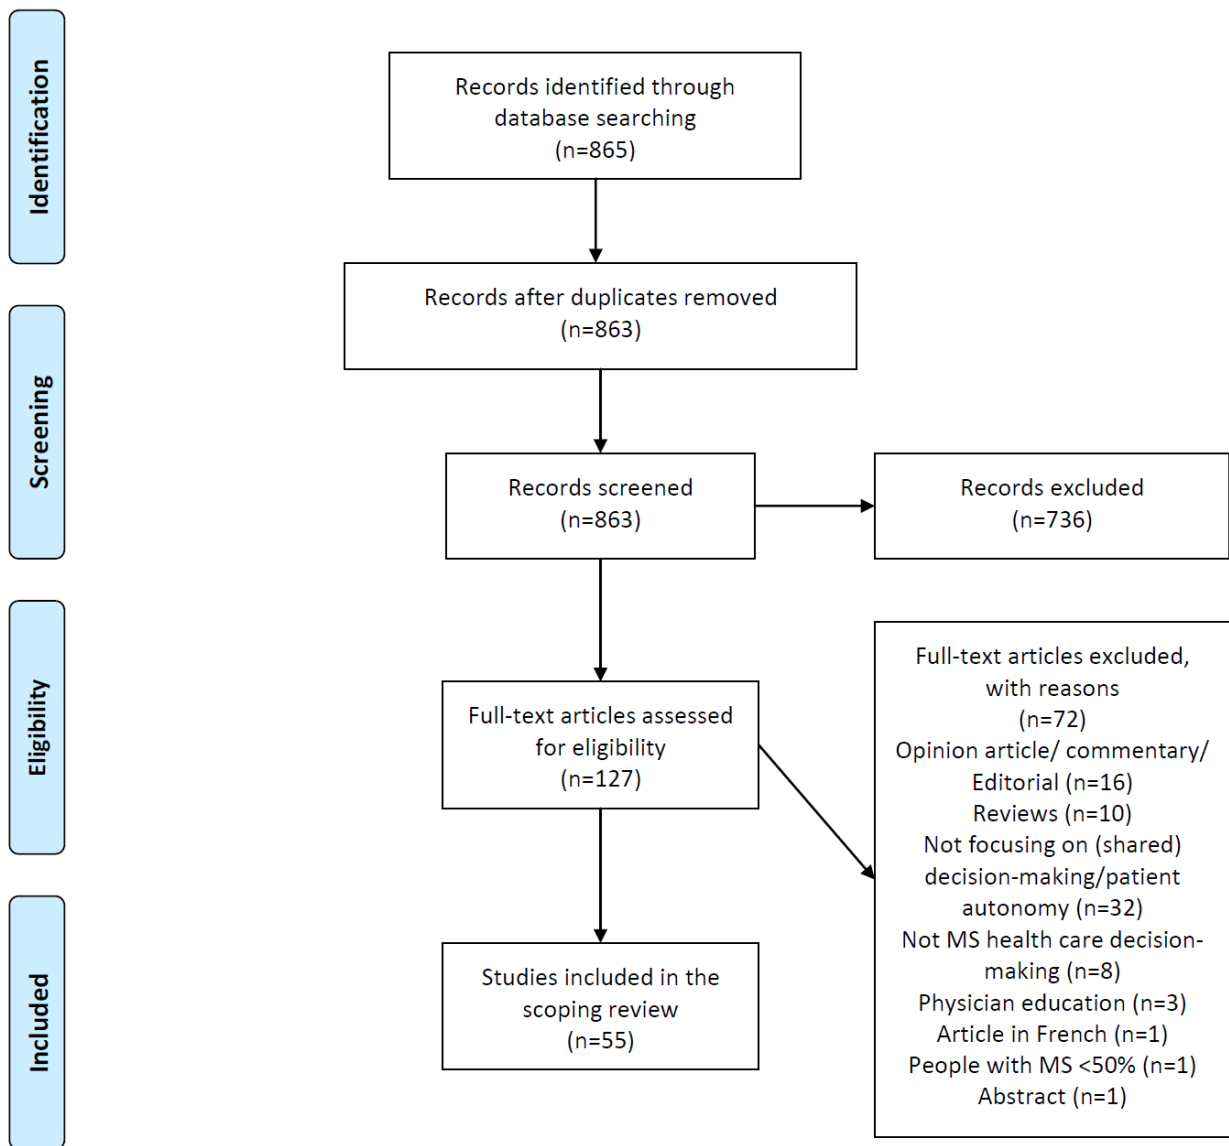

## Appendix S1. PRISMA-ScR Checklist

### Preferred Reporting Items for Systematic reviews and Meta-Analyses extension for Scoping Reviews (PRISMA-ScR) Checklist

| SECTION                   | ITEM | PRISMA-ScR CHECKLIST ITEM                                                                                                                                                                                                                                                 | REPORTED ON PAGE #            |
|---------------------------|------|---------------------------------------------------------------------------------------------------------------------------------------------------------------------------------------------------------------------------------------------------------------------------|-------------------------------|
| <b>TITLE</b>              |      |                                                                                                                                                                                                                                                                           |                               |
| Title                     | 1    | Identify the report as a scoping review.                                                                                                                                                                                                                                  | Page 1                        |
| <b>ABSTRACT</b>           |      |                                                                                                                                                                                                                                                                           |                               |
| Structured summary        | 2    | Provide a structured summary that includes (as applicable): background, objectives, eligibility criteria, sources of evidence, charting methods, results, and conclusions that relate to the review questions and objectives.                                             | Page 4                        |
| <b>INTRODUCTION</b>       |      |                                                                                                                                                                                                                                                                           |                               |
| Rationale                 | 3    | Describe the rationale for the review in the context of what is already known. Explain why the review questions/objectives lend themselves to a scoping review approach.                                                                                                  | -                             |
| Objectives                | 4    | Provide an explicit statement of the questions and objectives being addressed with reference to their key elements (e.g., population or participants, concepts, and context) or other relevant key elements used to conceptualize the review questions and/or objectives. | Pages 6 and 7                 |
| <b>METHODS</b>            |      |                                                                                                                                                                                                                                                                           |                               |
| Protocol and registration | 5    | Indicate whether a review protocol exists; state if and where it can be accessed (e.g., a Web address); and if available, provide registration information, including the registration number.                                                                            | Available upon author request |
| Eligibility criteria      | 6    | Specify characteristics of the sources of evidence used as eligibility criteria (e.g., years considered, language, and publication status), and provide a rationale.                                                                                                      | Page 6                        |
| Information sources*      | 7    | Describe all information sources in the search (e.g., databases with dates of coverage and contact with authors to identify additional sources), as well as the date the most recent search was executed.                                                                 | Page 6                        |

| SECTION                                               | ITEM | PRISMA-ScR CHECKLIST ITEM                                                                                                                                                                                                                                                                                  | REPORTED ON PAGE # |
|-------------------------------------------------------|------|------------------------------------------------------------------------------------------------------------------------------------------------------------------------------------------------------------------------------------------------------------------------------------------------------------|--------------------|
| Search                                                | 8    | Present the full electronic search strategy for at least 1 database, including any limits used, such that it could be repeated.                                                                                                                                                                            | Appendix S2        |
| Selection of sources of evidence†                     | 9    | State the process for selecting sources of evidence (i.e., screening and eligibility) included in the scoping review.                                                                                                                                                                                      | Page 7             |
| Data charting process‡                                | 10   | Describe the methods of charting data from the included sources of evidence (e.g., calibrated forms or forms that have been tested by the team before their use, and whether data charting was done independently or in duplicate) and any processes for obtaining and confirming data from investigators. | Page 7             |
| Data items                                            | 11   | List and define all variables for which data were sought and any assumptions and simplifications made.                                                                                                                                                                                                     | Page 7             |
| Critical appraisal of individual sources of evidence§ | 12   | If done, provide a rationale for conducting a critical appraisal of included sources of evidence; describe the methods used and how this information was used in any data synthesis (if appropriate).                                                                                                      | Not applicable     |
| Synthesis of results                                  | 13   | Describe the methods of handling and summarizing the data that were charted.                                                                                                                                                                                                                               | Page 6             |
| <b>RESULTS</b>                                        |      |                                                                                                                                                                                                                                                                                                            |                    |
| Selection of sources of evidence                      | 14   | Give numbers of sources of evidence screened, assessed for eligibility, and included in the review, with reasons for exclusions at each stage, ideally using a flow diagram.                                                                                                                               | Page 6; Figure 1   |
| Characteristics of sources of evidence                | 15   | For each source of evidence, present characteristics for which data were charted and provide the citations.                                                                                                                                                                                                | Pages 6 and 7      |
| Critical appraisal within sources of evidence         | 16   | If done, present data on critical appraisal of included sources of evidence (see item 12).                                                                                                                                                                                                                 | Not applicable     |
| Results of individual sources of evidence             | 17   | For each included source of evidence, present the relevant data that were charted that relate to the review questions and objectives.                                                                                                                                                                      | Table S1           |
| Synthesis of results                                  | 18   | Summarize and/or present the charting results as they relate to the review questions and objectives.                                                                                                                                                                                                       | Results            |

| SECTION             | ITEM | PRISMA-ScR CHECKLIST ITEM                                                                                                                                                                       | REPORTED ON PAGE #                                                              |
|---------------------|------|-------------------------------------------------------------------------------------------------------------------------------------------------------------------------------------------------|---------------------------------------------------------------------------------|
| <b>DISCUSSION</b>   |      |                                                                                                                                                                                                 |                                                                                 |
| Summary of evidence | 19   | Summarize the main results (including an overview of concepts, themes, and types of evidence available), link to the review questions and objectives, and consider the relevance to key groups. | Page 14                                                                         |
| Limitations         | 20   | Discuss the limitations of the scoping review process.                                                                                                                                          | Page 17                                                                         |
| Conclusions         | 21   | Provide a general interpretation of the results with respect to the review questions and objectives, as well as potential implications and/or next steps.                                       | Page 14                                                                         |
| <b>FUNDING</b>      |      |                                                                                                                                                                                                 |                                                                                 |
| Funding             | 22   | Describe sources of funding for the included sources of evidence, as well as sources of funding for the scoping review. Describe the role of the funders of the scoping review.                 | Available upon author request. This scoping review did not receive any funding. |

Note: Page numbers refer to original manuscript.

JBIG = Joanna Briggs Institute; PRISMA-ScR = Preferred Reporting Items for Systematic reviews and Meta-Analyses extension for Scoping Reviews.

\* Where *sources of evidence* (see second footnote) are compiled from, such as bibliographic databases, social media platforms, and Web sites.

† A more inclusive/heterogeneous term used to account for the different types of evidence or data sources (e.g., quantitative and/or qualitative research, expert opinion, and policy documents) that may be eligible in a scoping review as opposed to only studies. This is not to be confused with *information sources* (see first footnote).

‡ The frameworks by Arksey and O'Malley and Levac and colleagues and the JBI guidance refer to the process of data extraction in a scoping review as data charting.

§ The process of systematically examining research evidence to assess its validity, results, and relevance before using it to inform a decision. This term is used for items 12 and 19 instead of "risk of bias" (which is more applicable to systematic reviews of interventions) to include and acknowledge the various sources of evidence that may be used in a scoping review (e.g., quantitative and/or qualitative research, expert opinion, and policy document).

*From:* Tricco AC, Lillie E, Zarin W, O'Brien KK, Colquhoun H, Levac D, et al. PRISMA Extension for Scoping Reviews (PRISMA-ScR): Checklist and Explanation. *Ann Intern Med*. 2018;169:467–473. [doi: 10.7326/M18-0850](https://doi.org/10.7326/M18-0850)

## Appendix S2. MEDLINE search strategy

### Research question: Shared decision-making in multiple sclerosis

Search dates: 2014 – 6<sup>th</sup> August 2019

#### Search terms

|     |                                                 |
|-----|-------------------------------------------------|
| 1.  | "Multiple Sclerosis".mp. or Multiple Sclerosis/ |
| 2.  | Multiple Sclerosis, Relapsing-Remitting/        |
| 3.  | Demyelinating Diseases/                         |
| 4.  | "relapsing remitting multiple sclerosis".mp.    |
| 5.  | "remitting-relapsing multiple sclerosis".mp.    |
| 6.  | "remitting relapsing, multiple sclerosis".mp.   |
| 7.  | "multiple sclerosis, relapsing-remitting".mp.   |
| 8.  | "multiple sclerosis, relapsing remitting".mp    |
| 9.  | "acute relapsing multiple sclerosis".mp.        |
| 10. | "relapsing multiple sclerosis".mp.              |
| 11. | "multiple sclerosis, acute relapsing".mp.       |
| 12. | "progressive relapsing multiple sclerosis".mp.  |
| 13. | "progressive relapsing, multiple sclerosis".mp. |
| 14. | "multiple sclerosis, progressive relapsing".mp. |
| 15. | "demyelinating disease".mp.                     |
| 16. | "demyelinating diseases".mp.                    |
| 17. | "demyelinating disorder".mp.                    |
| 18. | "demyelinating disorders".mp.                   |
| 19. | "Encephalomyelitis disseminata".mp.             |
| 20. | "encephalitis disseminata".mp.                  |
| 21. | MS.mp.                                          |



|     |                                                                                                                                                                                                                                           |
|-----|-------------------------------------------------------------------------------------------------------------------------------------------------------------------------------------------------------------------------------------------|
| 22. | RRMS.mp.                                                                                                                                                                                                                                  |
| 23. | Myelitis, Transverse.mp. or Encephalomyelitis, Acute Disseminated/                                                                                                                                                                        |
| 24. | Multiple Sclerosis, Relapsing-Remitting.mp. or Demyelinating Diseases/                                                                                                                                                                    |
| 25. | Optic Neuritis/                                                                                                                                                                                                                           |
| 26. | "relapsing remitting multiple sclerosis".mp.                                                                                                                                                                                              |
| 27. | "optic neuritis".mp.                                                                                                                                                                                                                      |
| 28. | "devic disease".mp.                                                                                                                                                                                                                       |
| 29. | "clinically isolated syndromes".mp.                                                                                                                                                                                                       |
| 30. | "clinically isolated syndrome".mp.                                                                                                                                                                                                        |
| 31. | "transverse myelitis".mp.                                                                                                                                                                                                                 |
| 32. | "encephalomyelitis".mp.                                                                                                                                                                                                                   |
| 33. | "neuromyelitis".mp.                                                                                                                                                                                                                       |
| 34. | "chronic progressive multiple sclerosis".mp.                                                                                                                                                                                              |
| 35. | "chronic progressive, multiple sclerosis".mp.                                                                                                                                                                                             |
| 36. | "primary progressive multiple sclerosis".mp.                                                                                                                                                                                              |
| 37. | "secondary progressive multiple sclerosis".mp.                                                                                                                                                                                            |
| 38. | "progressive relapsing multiple sclerosis".mp.                                                                                                                                                                                            |
| 39. | "progressive relapsing, multiple sclerosis".mp.                                                                                                                                                                                           |
| 40. | "multiple sclerosis, progressive relapsing".mp.                                                                                                                                                                                           |
| 41. | "multiple sclerosis, secondary progressive".mp.                                                                                                                                                                                           |
| 42. | 1 or 2 or 3 or 4 or 5 or 6 or 7 or 8 or 9 or 10 or 11 or 12 or 13 or 14 or 15 or 16 or 17 or 18 or 19 or 20 or 21 or 22 or 23 or 24 or 25 or 26 or 27 or 28 or 29 or 30 or 31 or 32 or 33 or 34 or 35 or 36 or 37 or 38 or 39 or 40 or 41 |
| 43. | Decision Making/                                                                                                                                                                                                                          |
| 44. | "patient information".mp.                                                                                                                                                                                                                 |
| 45. | "health information".mp.                                                                                                                                                                                                                  |

|     |                                                                                                                                                                                                                                                                                                               |
|-----|---------------------------------------------------------------------------------------------------------------------------------------------------------------------------------------------------------------------------------------------------------------------------------------------------------------|
| 46. | "patient guidance".mp.                                                                                                                                                                                                                                                                                        |
| 47. | "audio-visual information".mp.                                                                                                                                                                                                                                                                                |
| 48. | "decision making".mp.                                                                                                                                                                                                                                                                                         |
| 49. | "decision-making".mp.                                                                                                                                                                                                                                                                                         |
| 50. | "shared decision making".mp.                                                                                                                                                                                                                                                                                  |
| 51. | "shared decision-making".mp.                                                                                                                                                                                                                                                                                  |
| 52. | "informed choice".mp.                                                                                                                                                                                                                                                                                         |
| 53. | "decision support".mp.                                                                                                                                                                                                                                                                                        |
| 54. | "informed choices".mp.                                                                                                                                                                                                                                                                                        |
| 55. | "decisional support".mp.                                                                                                                                                                                                                                                                                      |
| 56. | "decision coaching".mp.                                                                                                                                                                                                                                                                                       |
| 57. | "decision counselling".mp.                                                                                                                                                                                                                                                                                    |
| 58. | "decision counseling".mp. [mp=title, abstract, original title, name of substance word, subject heading word, floating sub-heading word, keyword heading word, organism supplementary concept word, protocol supplementary concept word, rare disease supplementary concept word, unique identifier, synonyms] |
| 59. | "patient education".mp.                                                                                                                                                                                                                                                                                       |
| 60. | 43 or 44 or 45 or 46 or 47 or 48 or 49 or 50 or 51 or 52 or 53 or 54 or 55 or 56 or 57 or 58 or 59                                                                                                                                                                                                            |
| 61. | 42 and 60                                                                                                                                                                                                                                                                                                     |
| 62. | limit 61 to last 5 years                                                                                                                                                                                                                                                                                      |
